# Supplementary material for: Instructor facilitation mediates students’ negative perceptions of active learning instruction
Source: PLOS journal article supplement (doi:10.1371/journal.pone.0261706), 2021-12-23
Supplement: S3 (10.1371/journal.pone.0261706.s003) [file journal.pone.0261706.s003]

**Table S2. Relationship between active learning and course grades.** In this analysis, we include student-level covariates, classroom-level covariates, instructor characteristics, entry term fixed effects, time trend, and department fixed effects. Standard errors are in parentheses.

|                                                           | Grades             |
|-----------------------------------------------------------|--------------------|
| Active Learning vs. Lecture-Based                         | 0.006<br>(0.028)   |
| Racially Minoritized                                      | -0.053*<br>(0.026) |
| Perception of Instructor Facilitation of Group Activities | 0.023<br>(0.022)   |
| R-sq                                                      | 0.484              |
| N                                                         | 4257               |

+  $p < 0.10$ , \*  $p < 0.05$ , \*\*  $p < 0.01$ , \*\*\*  $p < 0.001$
